# Supplementary material for: Application of Immune Infiltration Signature and Machine Learning Model in the Differential Diagnosis and Prognosis of Bone-Related Malignancies
Source: Front Cell Dev Biol. 2021 Apr 15;9:630355. doi: 10.3389/fcell.2021.630355 (PMC8082117; doi:10.3389/fcell.2021.630355)
Supplement: Supplementary file 3 [file Table_1.XLSX]

## Sheet: Sheet1
Datasets	Disease	Total Samples	Valid Samples	Cohort	Plaform
GSE34620	EW	117	117	Discovery	GPL570 [HG-U133_Plus_2] Affymetrix Human Genome U133 Plus 2.0 Array
GSE63157	EW	85	85	Discovery	GPL5175 [HuEx-1_0-st] Affymetrix Human Exon 1.0 ST Array [transcript (gene) version]
GSE37371	EW	39	39	Discovery	GPL96 [HG-U133A] Affymetrix Human Genome U133A Array;GPL570 [HG-U133_Plus_2] Affymetrix Human Genome U133 Plus 2.0 Array
GSE68776	EW	32	32	Discovery	GPL5175 [HuEx-1_0-st] Affymetrix Human Exon 1.0 ST Array [transcript (gene) version]
GSE17618	EW	55	44	Discovery	GPL570 [HG-U133_Plus_2] Affymetrix Human Genome U133 Plus 2.0 Array
TARGET-OS	OS	89	89	Discovery	GPL5188 Gene Chip® Human Exon ST Array (Affymetrix)
GSE14359	OS	20	5	Discovery	GPL96 [HG-U133A] Affymetrix Human Genome U133A Array
GSE16091	OS	34	34	Discovery	GPL96 [HG-U133A] Affymetrix Human Genome U133A Array
GSE33382	OS	87	84	Discovery	GPL10295 Illumina human-6 v2.0 expression beadchip (using nuIDs as identifier)
GSE21257	OS	53	53	Discovery	GPL10295 Illumina human-6 v2.0 expression beadchip (using nuIDs as identifier)
GSE87437	OS	21	21	Discovery	GPL570 [HG-U133_Plus_2] Affymetrix Human Genome U133 Plus 2.0 Array
GSE30699	OS	107	75	Discovery	GPL10295 Illumina human-6 v2.0 expression beadchip (using nuIDs as identifier)
GSE32981	OS	23	23	Discovery	GPL3307 ABI Human Genome Survey Microarray v2.0
GSE39055	OS	37	37	Discovery	GPL14951 Illumina HumanHT-12 WG-DASL V4.0 R2 expression beadchip
GSE101607	BM	60	60	Discovery	GPL10558 Illumina HumanHT-12 V4.0 expression beadchip
GSE74685	BM	149	20	Discovery	GPL15659 Agilent-016162 PEDB Whole Human Genome Microarray 4x44K [Probe Name version]
GSE32269	BM	55	29	Discovery	GPL96 [HG-U133A] Affymetrix Human Genome U133A Array
GSE4204	MM	538	538	Discovery	GPL570 [HG-U133_Plus_2] Affymetrix Human Genome U133 Plus 2.0 Array
GSE16016	EW	10	10	Validation	GPL5175 [HuEx-1_0-st] Affymetrix Human Exon 1.0 ST Array [transcript (gene) version]
GSE14827	OS	27	27	Validation	GPL570 [HG-U133_Plus_2] Affymetrix Human Genome U133 Plus 2.0 Array
GSE77930	BM	20	20	Validation	GPL15659 Agilent-016162 PEDB Whole Human Genome Microarray 4x44K [Probe Name version]
GSE77539	MM	17	17	Validation	GPL6244 [HuGene-1_0-st] Affymetrix Human Gene 1.0 ST Array [transcript (gene) version]

## Sheet: Sheet2
GPL570[HG-U133_Plus_2] Affymetrix Human Genome U133 Plus 2.0 Array
GPL5175[HuEx-1_0-st] Affymetrix Human Exon 1.0 ST Array [transcript (gene) version]
GPL96[HG-U133A] Affymetrix Human Genome U133A Array;GPL570 [HG-U133_Plus_2] Affymetrix Human Genome U133 Plus 2.0 Array
GPL5175[HuEx-1_0-st] Affymetrix Human Exon 1.0 ST Array [transcript (gene) version]
GPL570[HG-U133_Plus_2] Affymetrix Human Genome U133 Plus 2.0 Array
GPL5188 Gene Chip® Human Exon ST Array (Affymetrix)
GPL96[HG-U133A] Affymetrix Human Genome U133A Array
GPL96[HG-U133A] Affymetrix Human Genome U133A Array
GPL10295 Illumina human-6 v2.0 expression beadchip (using nuIDs as identifier)
GPL10295 Illumina human-6 v2.0 expression beadchip (using nuIDs as identifier)
GPL570 [HG-U133_Plus_2] Affymetrix Human Genome U133 Plus 2.0 Array
GPL10295Illumina human-6 v2.0 expression beadchip (using nuIDs as identifier)
GPL3307ABI Human Genome Survey Microarray v2.0
GPL14951Illumina HumanHT-12 WG-DASL V4.0 R2 expression beadchip
GPL10558Illumina HumanHT-12 V4.0 expression beadchip
GPL15659 Agilent-016162 PEDB Whole Human Genome Microarray 4x44K [Probe Name version]
GPL96[HG-U133A] Affymetrix Human Genome U133A Array
GPL570 [HG-U133_Plus_2] Affymetrix Human Genome U133 Plus 2.0 Array
GPL5175[HuEx-1_0-st] Affymetrix Human Exon 1.0 ST Array [transcript (gene) version]
GPL570[HG-U133_Plus_2] Affymetrix Human Genome U133 Plus 2.0 Array
GPL15659Agilent-016162 PEDB Whole Human Genome Microarray 4x44K [Probe Name version]
GPL6244[HuGene-1_0-st] Affymetrix Human Gene 1.0 ST Array [transcript (gene) version]
GPL570[HG-U133_Plus_2] Affymetrix Human Genome U133 Plus 2.0 Array
GPL570[HG-U133_Plus_2] Affymetrix Human Genome U133 Plus 2.0 Array
GPL570 [HG-U133_Plus_2] Affymetrix Human Genome U133 Plus 2.0 Array
GPL570 [HG-U133_Plus_2] Affymetrix Human Genome U133 Plus 2.0 Array
GPL570[HG-U133_Plus_2] Affymetrix Human Genome U133 Plus 2.0 Array
